# Supplementary material for: Wild Apples Are Not That Wild: Conservation Status and Potential Threats of Malus sieversii in the Mountains of Central Asia Biodiversity Hotspot
Source: MDPI journal article supplement (doi:10.3390/d14060489), 2022-06-15
Supplement: s1 [file s1]

## Supplementary Materials:

**Table S1.** The number, range size and proportion of current protected areas (PAs) for wild fruit forests and wild apples in the study area.

| Country    | Region           | Total PAs |                               | PAs for wild fruit forests |                                                  | PAs for wild apples |                                                  |
|------------|------------------|-----------|-------------------------------|----------------------------|--------------------------------------------------|---------------------|--------------------------------------------------|
|            |                  | Number    | Range size (km <sup>2</sup> ) | Number                     | Range size (km <sup>2</sup> ) and proportion (%) | Number              | Range size (km <sup>2</sup> ) and proportion (%) |
| China      | Xinjiang         | 8         | 8,933                         | 1                          | 1,150 (12.88%)                                   | 1                   | 1,150 (12.88%)                                   |
| Kazakhstan | East Kazakhstan  | 7         | 14,689                        | 0                          | 0                                                | 0                   | 0                                                |
|            | Almaty           | 16        | 59,492                        | 6                          | 33,131 (55.69%)                                  | 6                   | 33,131 (55.69%)                                  |
|            | Zhambyl          | 2         | 202                           | 0                          | 0                                                | 0                   | 0                                                |
|            | South Kazakhstan | 9         | 85,738                        | 3                          | 6,508 (7.59%)                                    | 3                   | 6,508 (7.59%)                                    |
| Kyrgyzstan | /                | 30        | 18,967                        | 10                         | 15,135 (79.8%)                                   | 3                   | 1,400 (7.39%)                                    |
| Tajikistan | /                | 18        | 29,111                        | 16                         | 29,005 (99.63%)                                  | 16                  | 29,005 (99.63%)                                  |
| Uzbekistan | /                | 20        | 15,759                        | 9                          | 7,033 (44.63%)                                   | 5                   | 6,413 (40.69%)                                   |
| Total      |                  | 110       | 232,891                       | 45                         | 91,963 (39.49%)                                  | 34                  | 77,608 (33.32%)                                  |

**Table S2.** The range size and proportion of suitable habitats for wild apples in the current and future scenarios.

| Country    | Region           | Range size (km <sup>2</sup> ) and proportion (%) |                |                |                |                |
|------------|------------------|--------------------------------------------------|----------------|----------------|----------------|----------------|
|            |                  | Current                                          | 2050s (SSP126) | 2050s (SSP585) | 2090s (SSP126) | 2090s (SSP585) |
| China      | Xinjiang         | 14,070(29.96%)                                   | 16,758(33.77%) | 12,558(27.29%) | 16,821(34.39%) | 8,358(18.1%)   |
| Kazakhstan | East Kazakhstan  | 3,087(6.57%)                                     | 15,582(31.4%)  | 20,790(45.18%) | 15,099(30.87%) | 28,539(61.8%)  |
|            | Almaty           | 8,715(18.56%)                                    | 7,707(15.53%)  | 6,888(14.97%)  | 7,497(15.33%)  | 6,237(13.51%)  |
|            | Zhambyl          | 2,835(6.04%)                                     | 1,638(3.3%)    | 1,239(2.69%)   | 1,638(3.35%)   | 987(2.14%)     |
|            | South Kazakhstan | 3,339(7.11%)                                     | 1,512(3.05%)   | 672(1.46%)     | 1,554(3.18%)   | 798(1.73%)     |
| Kyrgyzstan | /                | 13,587(28.94%)                                   | 6,048(12.19%)  | 3,843(8.35%)   | 6,027(12.32%)  | 1,239(2.68%)   |
| Tajikistan | /                | 1,155(2.46%)                                     | 357(0.72%)     | 0              | 273(0.56%)     | 21(0.05%)      |
| Uzbekistan | /                | 168(0.36%)                                       | 21(0.04%)      | 21(0.05%)      | 0              | 0              |
| Total      |                  | 46,956                                           | 49,623         | 46,011         | 48,909         | 46,179         |

**Table S3.** Proportional changes of suitable habitats for wild apples in the future scenarios.

| Country    | Region           | Proportion of changes (%) |                |                |                |
|------------|------------------|---------------------------|----------------|----------------|----------------|
|            |                  | 2050s (SSP126)            | 2050s (SSP585) | 2090s (SSP126) | 2090s (SSP585) |
| China      | Xinjiang         | 19.10                     | 19.55          | -10.75         | -40.60         |
| Kazakhstan | East Kazakhstan  | 404.76                    | 389.12         | 573.47         | 824.49         |
|            | Almaty           | -11.57                    | -13.98         | -20.96         | -28.43         |
|            | Zhambyl          | -42.22                    | -42.22         | -56.30         | -65.19         |
|            | South Kazakhstan | -54.72                    | -53.46         | -79.87         | -76.10         |
| Kyrgyzstan | /                | -55.49                    | -55.64         | -71.72         | -90.88         |
| Tajikistan | /                | -69.09                    | -76.36         | -100.00        | -98.18         |
| Uzbekistan | /                | -87.50                    | -100.00        | -87.50         | -100.00        |
|            | Total loss       | -26.65                    | -39.71         | -27.28         | -55.86         |
|            | Total gain       | 32.33                     | 37.70          | 31.44          | 54.20          |
